# Supplementary material for: Genetically engineered magnetic nanocages for cancer magneto-catalytic theranostics
Source: PubMed Central journal article supplement (PMC7591490; doi:10.1038/s41467-020-19061-9), 2020-10-27
Supplement: 41467_2020_19061_MOESM1_ESM.pdf [file 41467_2020_19061_MOESM1_ESM.pdf]

**Supplementary Information**

**Genetically Engineered Magnetic Nanocages for Cancer Magneto-Catalytic  
Theranostics**

**Zhang *et al.***

**Table of Contents:**

**-Supplementary Figures 1-12**

## **Genetically Engineered Magnetic Nanocages for Cancer Magneto-Catalytic Theranostics**

Yang Zhang<sup>1</sup>, Xiaoyong Wang<sup>1,2</sup>, Chengchao Chu<sup>1</sup>, Zijian Zhou<sup>3</sup>, Biaoqi Chen<sup>4</sup>, Xin Pang<sup>1</sup>, Gan Lin<sup>1</sup>, Huirong Lin<sup>1</sup>, Yuxin Guo<sup>5</sup>, En Ren<sup>1</sup>, Peng Lv<sup>1</sup>, Yesi Shi<sup>1</sup>, Qingbing Zheng<sup>1,2</sup>, Xiaohui Yan<sup>1</sup>, Xiaoyuan Chen<sup>3</sup>, Gang Liu<sup>1,2\*</sup>

<sup>1</sup> State Key Laboratory of Molecular Vaccinology and Molecular Diagnostics, Center for Molecular Imaging and Translational Medicine, School of Public Health, Xiamen University, Xiamen 361102, China.

<sup>2</sup> State Key Laboratory of Cellular Stress Biology, Innovation Center for Cell Biology, School of Life Sciences, Xiamen University, Xiamen 361102, China.

<sup>3</sup> Laboratory of Molecular Imaging and Nanomedicine, National Institute of Biomedical Imaging and Bioengineering (NIBIB), National Institutes of Health (NIH), MD 20892, USA.

<sup>4</sup> Fujian Provincial Key Laboratory of Biochemical Technology, Institute of Biomaterials and Tissue Engineering, Huaqiao University, Xiamen 361021, China.

<sup>5</sup> Fujian Provincial Key Laboratory of Innovative Drug Target Research, School of Pharmaceutical Sciences, Xiamen University, Xiamen 361102, China.

\* Corresponding author. E-mail: gangliu.cmitm@xmu.edu.cn

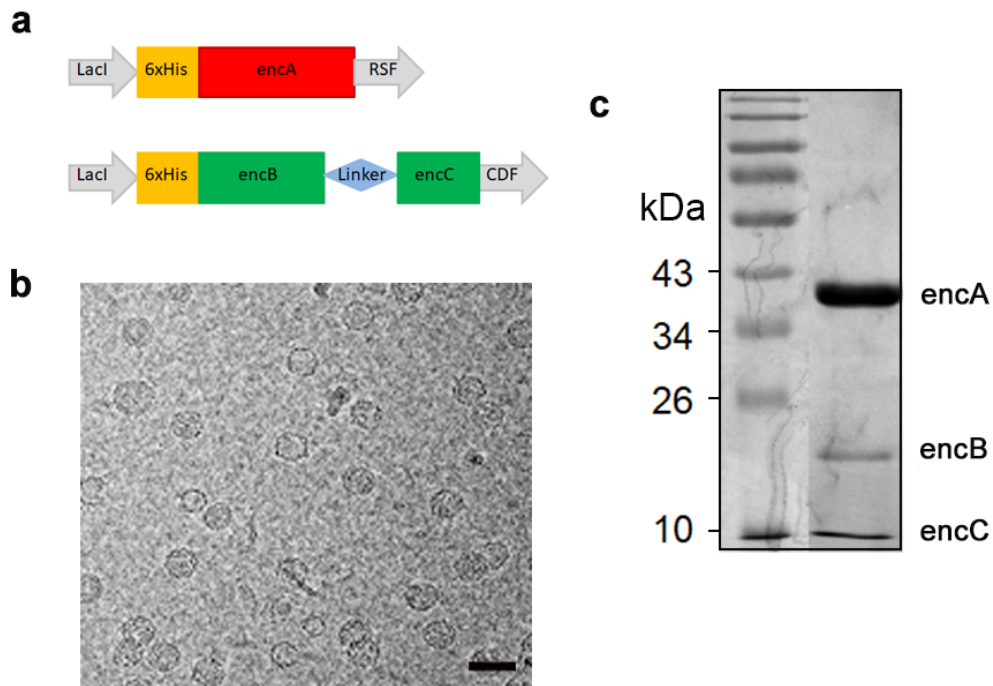

**Supplementary Figure 1.** Plasmid construction and expression of encABC. **a** encA cloned into pRSFDuet-1; encB and encC cloned into co-expression vector. **b** Representative cryo-EM image of encABC (scale bar: 50 nm). **c** SDS-PAGE to identify the compose of encABC. One of three repetitions with similar results is shown for (b) and (c).

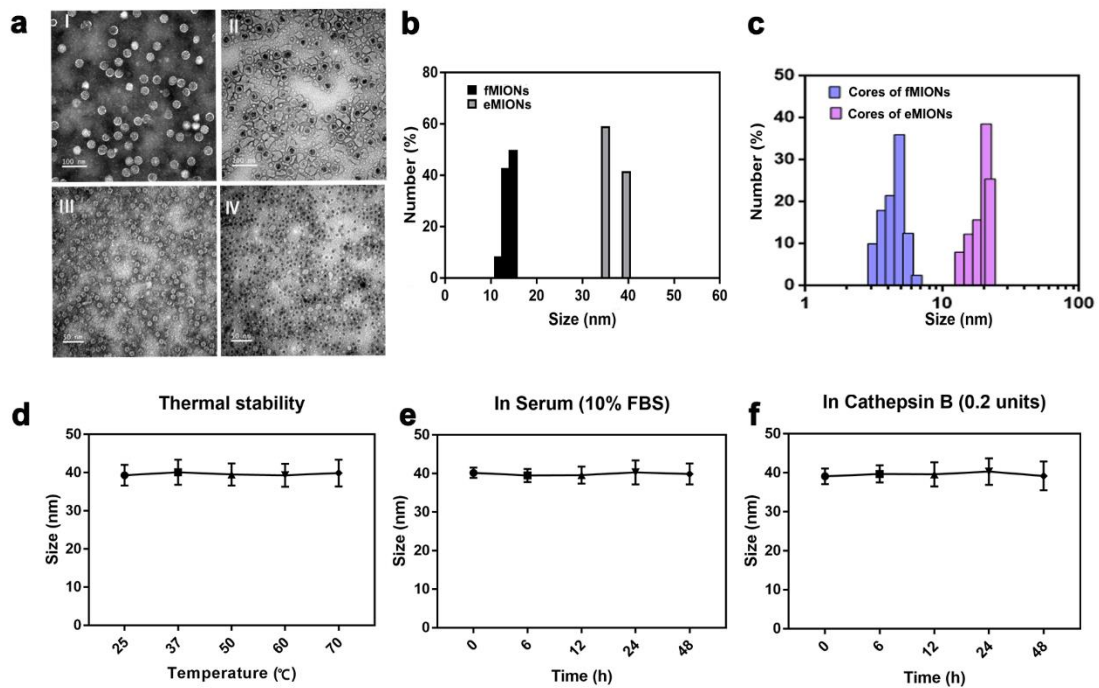

**Supplementary Figure 2.** Morphology of fMIONs and eMIONs. **a** Representative TEM images of enc ABC (I) (Scale bar: 100 nm), eMIONs (II) (Scale bar: 100 nm) and fn (III) (Scale bar: 50 nm), fMIONs (IV) (One of three repetitions with similar results is shown, Scale bar: 50 nm); **b** Size of the fMIONs and eMIONs. **c** Size of the cores of fMIONs and eMIONs. **d,e,f** Stability detection of eMIONs in different conditions: various temperatures (25 °C, 37 °C, 50 °C, 60 °C and 70 °C) (**d**); in cell culture with 10% FBS at 37 °C (**e**); and in cathepsin B (0.2 units) solution at 37 °C (**f**). Data are presented as mean  $\pm$  SD (n = 5 independent experiments).

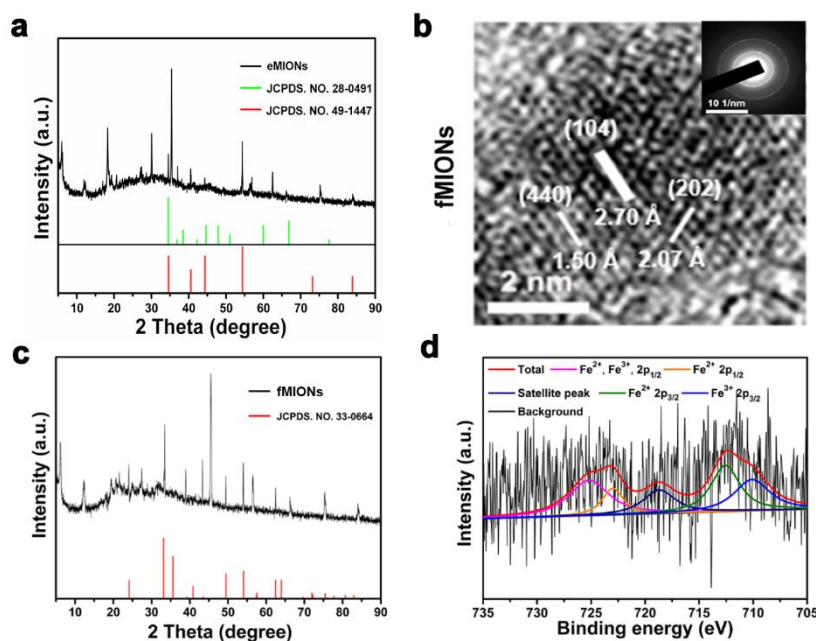

**Supplementary Figure 3.** Characterization of fMIONs and eMIONs. **a** XRD of eMIONs. **b** HRTEM and corresponding FFT pattern (inset) of fMIONs nanocrystals. One of three repetitions with similar results is shown. **c,d** XRD and XPS analysis to estimate fMIONs, showing its component is  $\gamma$ -Fe<sub>2</sub>O<sub>3</sub>.

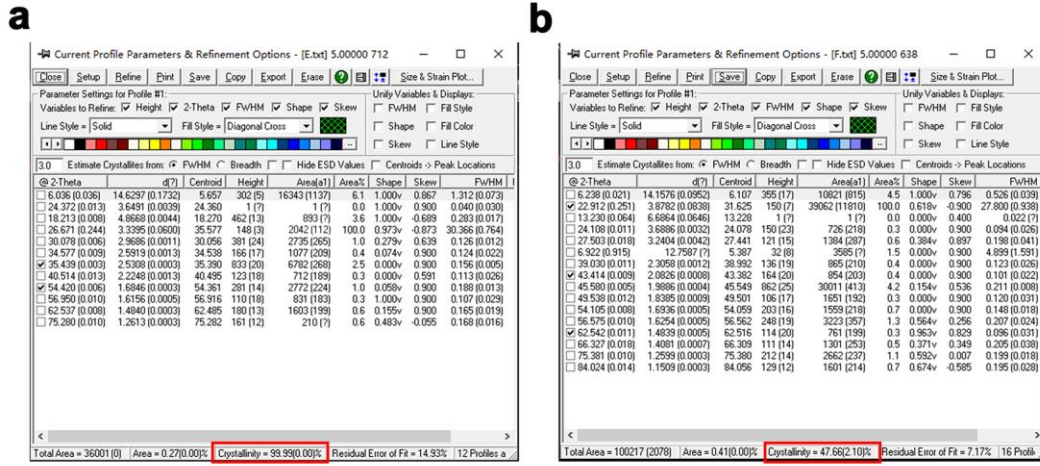

**Supplementary Figure 4.** Crystallinity evaluation of eMIONs and fMIONs. Results of XRD data analysis by JADE software, showed that the crystallinities of eMIONs (a) and fMIONs (b) were 99.99% and 47.66%, respectively.

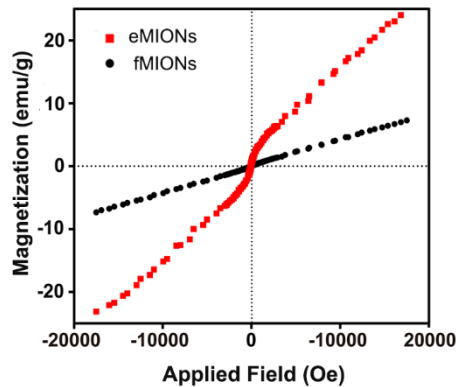

**Supplementary Figure 5.** Magnetic responsiveness evaluation of fMIONs and eMIONs. Results of VSM analysis of eMIONs and fMIONs.

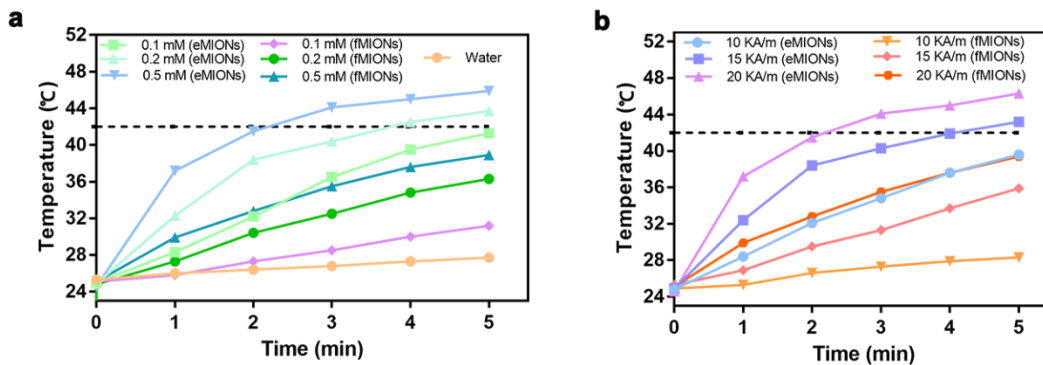

**Supplementary Figure 6.** Magnetic hyperthermia evaluation of fMIONs and eMIONs. a Temperature changes within different concentrations of eMIONs and

fMIONs in AMF (500 kHz, 20 KA/m). **b** Temperature changes within different AMF powers (eMIONs 0.5 mM; fMIONs 0.5 mM). Data are presented as mean  $\pm$  SD (n = 5 independent experiments).

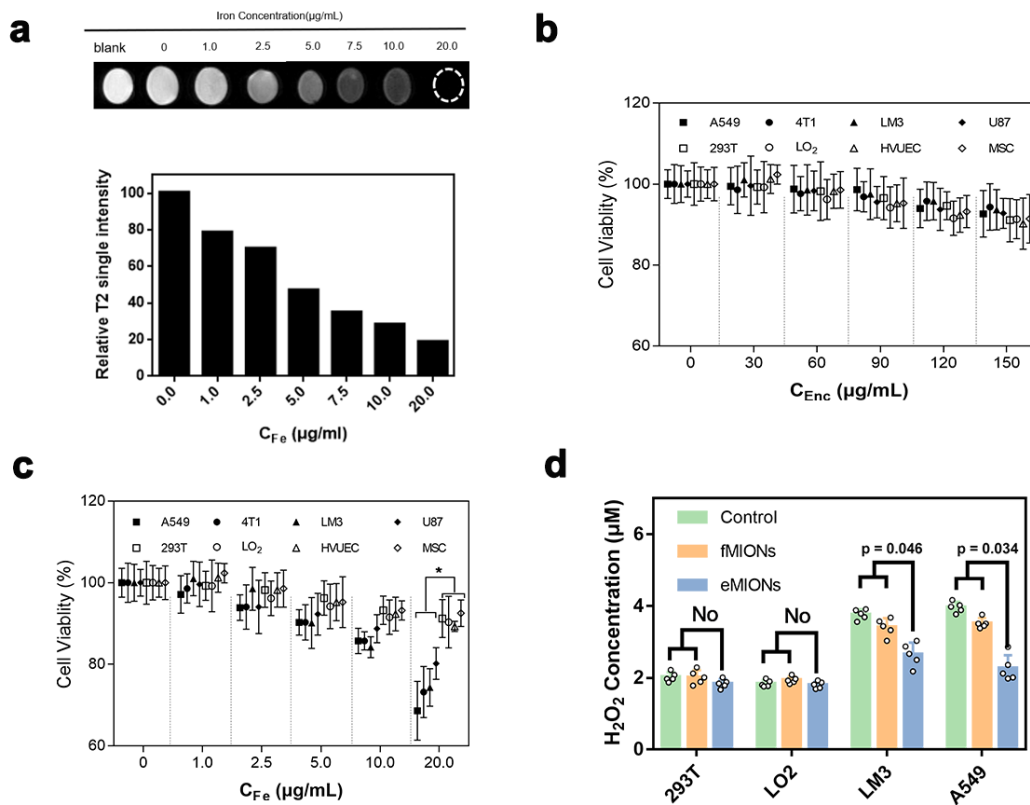

**Supplementary Figure 7.** Cell uptake and cytotoxicity of NPs. **a** Cell MRI of eMIONs with different concentrations incubated 3 h with A549 cell line. **b** encABC incubated in different cell lines with different concentrations. **c** eMIONs incubated in different cell lines with different concentrations,  $p = 0.035$ . **d** Concentration of H<sub>2</sub>O<sub>2</sub> in different cell lines and after incubated with eMIONs and fMIONs. Data are presented as mean  $\pm$  SD (n = 5 independent samples), and statistical significance was calculated with two-tailed Student's  $t$  test, and \* indicated that  $p < 0.05$ .

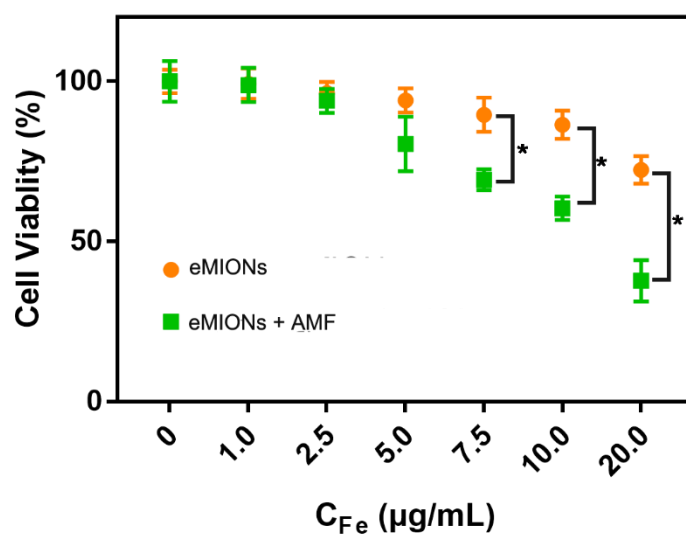

**Supplementary Figure 8.** Cellular toxicity of LM3 cell line with treatment of eMIONs. Cell viabilities of LM3 cell line receiving different concentration of eMIONs with/without AMF. Data are presented as mean  $\pm$  SD ( $n = 5$  biologically independent samples). Statistical significance was calculated with two-tailed Student's  $t$  test, and \* indicated that  $p < 0.05$ .

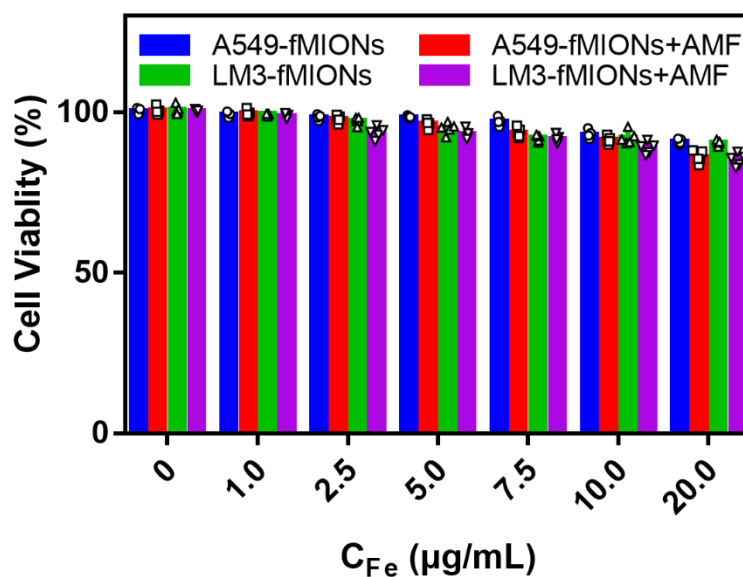

**Supplementary Figure 9.** Cellular toxicity of A549 and LM3 cell lines with treatment of fMIONs. Cell viabilities of A549 and LM3 cell lines receiving different concentration of fMIONs with/without AMF. Data are presented as mean  $\pm$  SD ( $n = 5$  biologically independent samples).

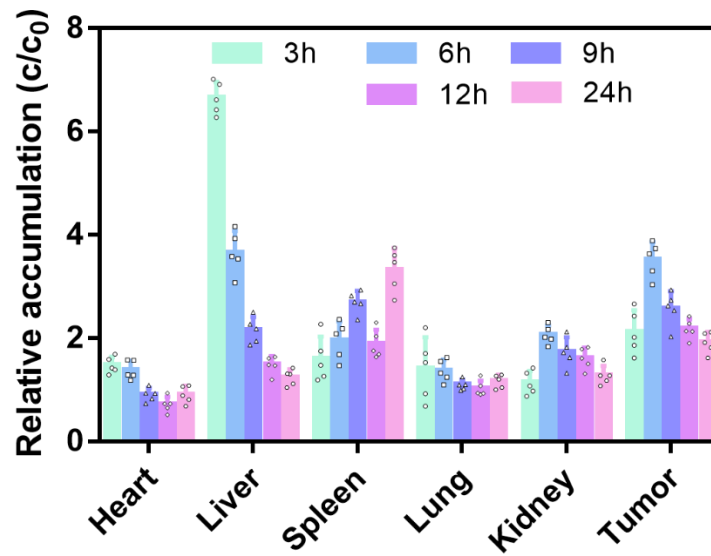

**Supplementary Figure 10.** Biodistribution of eMIONs. Biodistribution of eMIONs *via* tail vein injection at different time points in main organs and tumor. Data are presented as mean  $\pm$  SD (n = 5 biologically independent mice).



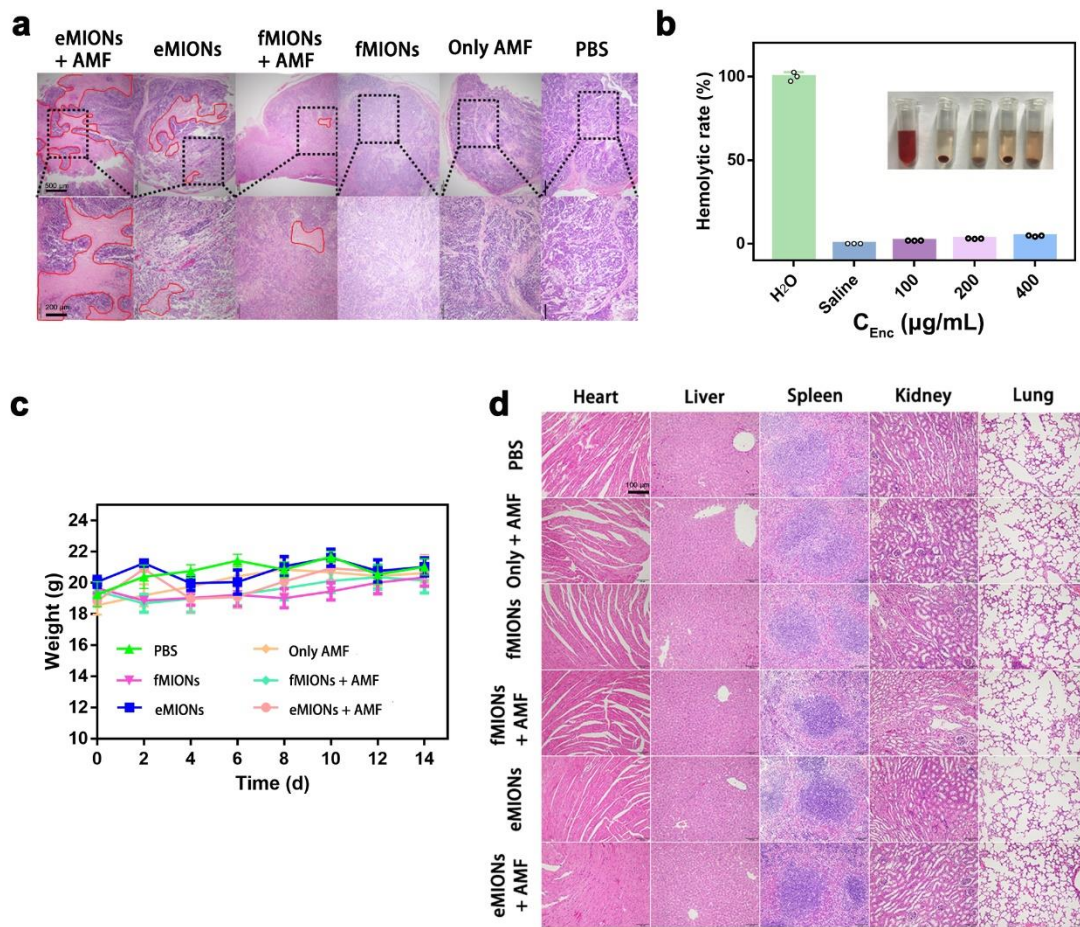

**Supplementary Figure 11.** H&E staining, hemolytic activity test, and body weight changes of subcutaneous models after therapy. **a** H&E staining of A549 tumor regions at 7 d after different treatments, red solid line shows the regions of undergoing cell death. Scale bar of above pictures: 500  $\mu\text{m}$ ; Scale bar of nether pictures: 200  $\mu\text{m}$ . **b** Hemolytic test to verify the biosafety of eMIONs. Data are presented as mean  $\pm$  SD ( $n = 3$  biologically independent samples). **c** Body weight changing process of mice after therapy. **d** H&E stained major organs harvested from the A549 subcutaneous tumor mice after different therapy, Scale bar: 100  $\mu\text{m}$ . The tumor and all major organs of different groups ( $n = 5$  biologically independent mice) were collected and a slice of each one was stained, the representative images are shown here for (**a**) and (**d**).

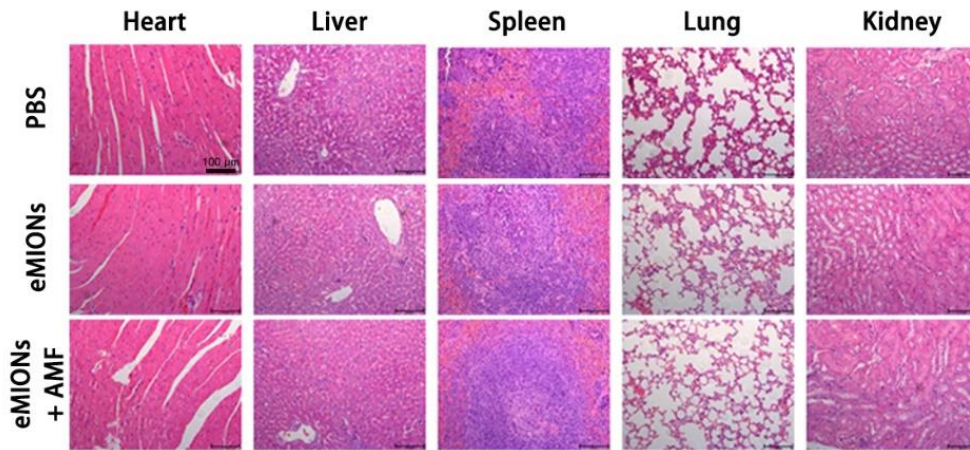

**Supplementary Figure 12.** H&E staining of orthotopic models after therapy. H&E stained major organs harvested from the orthotopic hepatocellular carcinoma mice after different therapy. Scale bar: 100  $\mu\text{m}$ . The major organs of PBS group (n = 3 biologically independent mice), eMIONS group (n = 3 biologically independent mice) and eMIONS + AMF group (n = 5 biologically independent mice) were collected and a slice of each one was stained, the representative images are shown here.
